# Supplementary material for: Tumor necrosis factor-like weak inducer of apoptosis (TWEAK) promotes glioma cell invasion through induction of NF-κB-inducing kinase (NIK) and noncanonical NF-κB signaling
Source: Springer Nature journal article supplement (doi:10.1186/s12943-014-0273-1), 2015-01-26

# Supplemental Figure 3

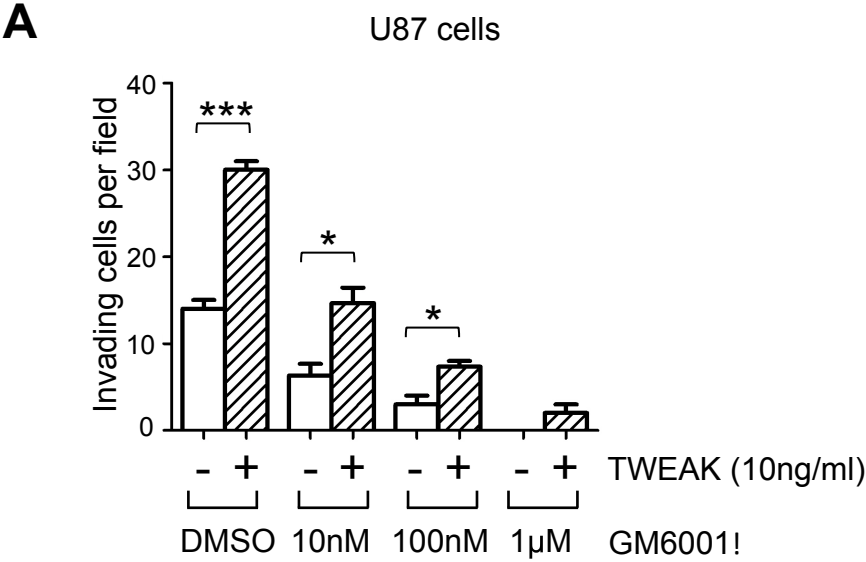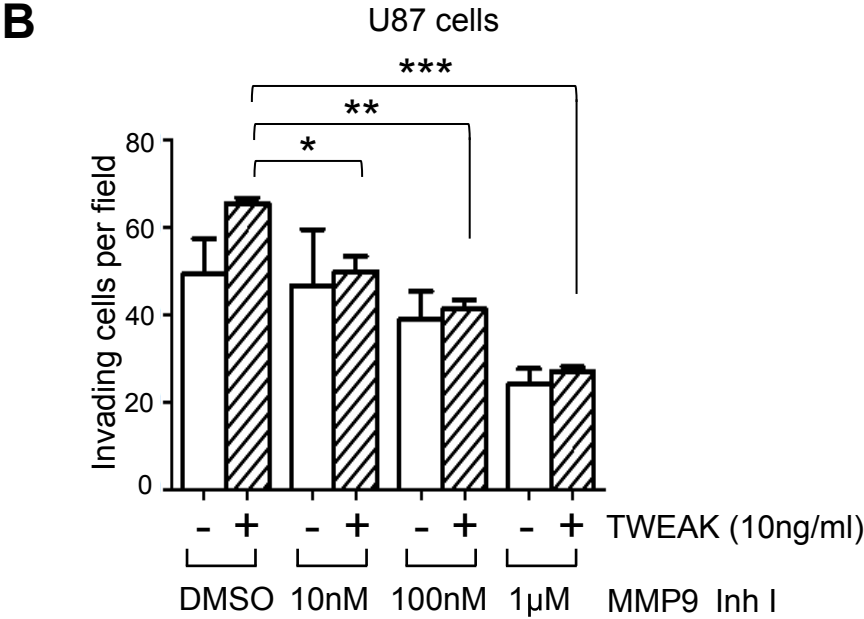

Supplement: MOESM1 [file 9762898]
